# Supplementary material
Source: PubMed Central journal article supplement (PMC4277099)

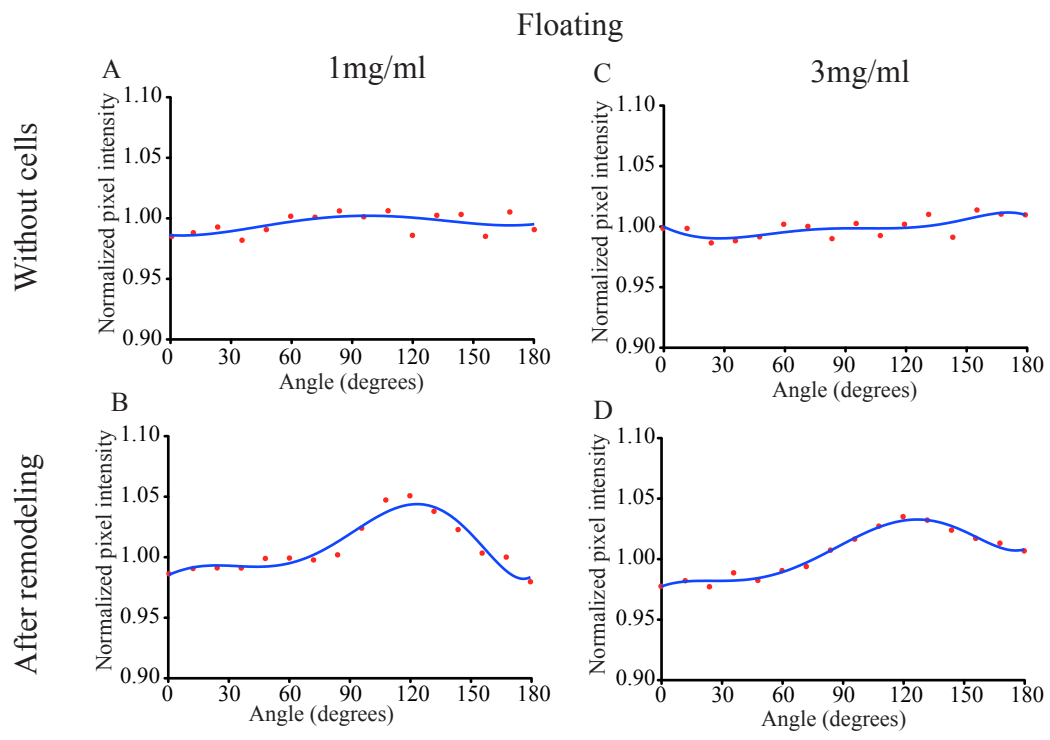

Figure S2

Supplement: rsif20141074supp2.pdf [file rsif20141074supp2.pdf]

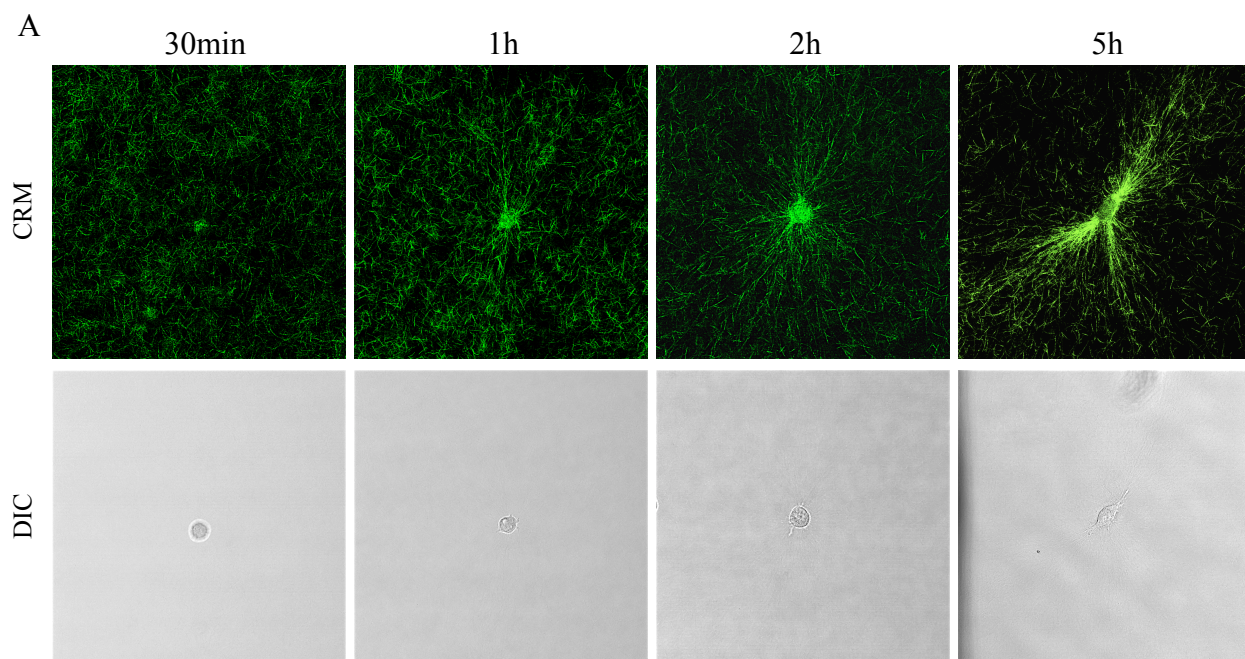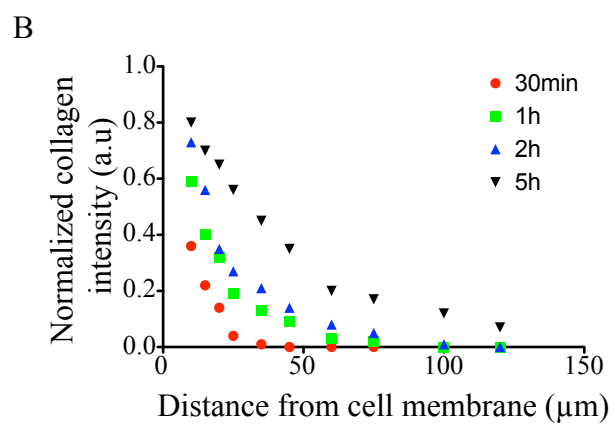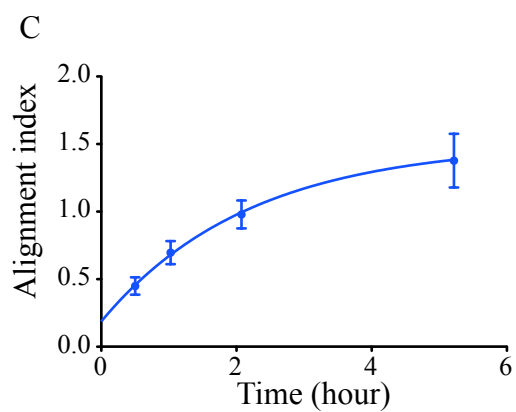

Figure S3

Supplement: rsif20141074supp3.pdf [file rsif20141074supp3.pdf]

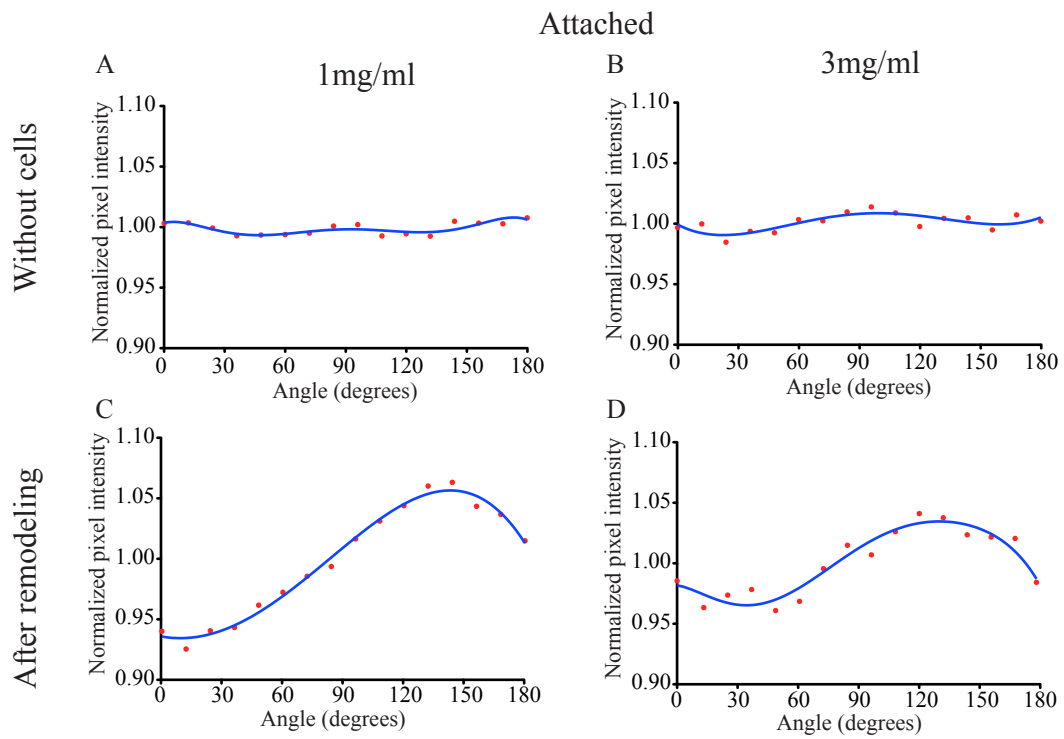

Figure S4

Supplement: rsif20141074supp4.pdf [file rsif20141074supp4.pdf]

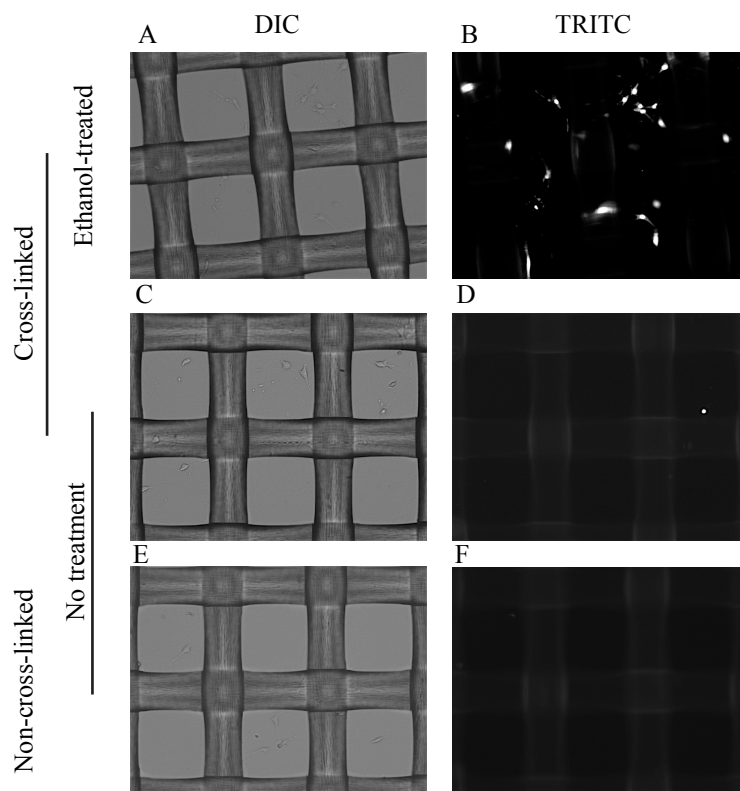

Figure S5

Supplement: rsif20141074supp5.pdf [file rsif20141074supp5.pdf]
